# Supplementary material for: Primary Sequence and 3D Structure Prediction of the Plant Toxin Stenodactylin
Source: MDPI journal article supplement (doi:10.3390/toxins12090538), 2020-08-21
Supplement: s1 [file s1]

## Supplementary Materials: Primary Sequence and 3D Structure Prediction of the Plant Toxin Stenodactylin

Rosario Iglesias, Letizia Polito, Massimo Bortolotti, Manuela Pedrazzi, Lucía Citores, José M. Ferreras and Andrea Bolognesi

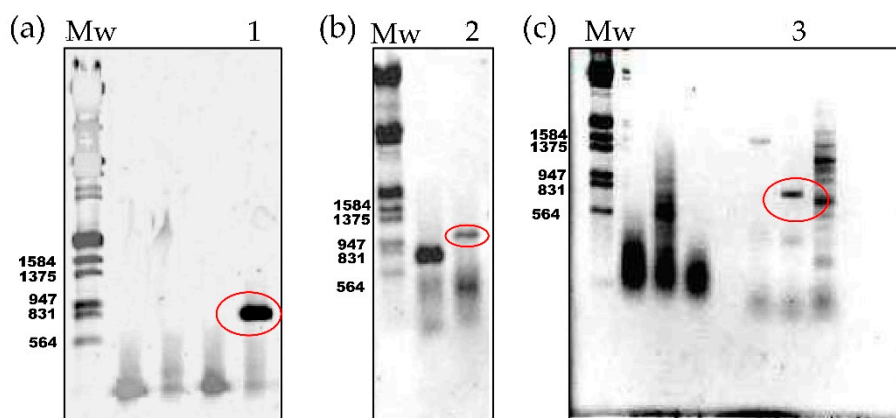

**Figure S1.** Amplification of stenodactylin A-chain (a, lane 1), A-chain and a part of B-chain (b, lane 2), B-chain (c, lane 3). MW:  $\lambda$  Hind III/EcoRI double digest DNA marker. The red circles indicate the amplificate.

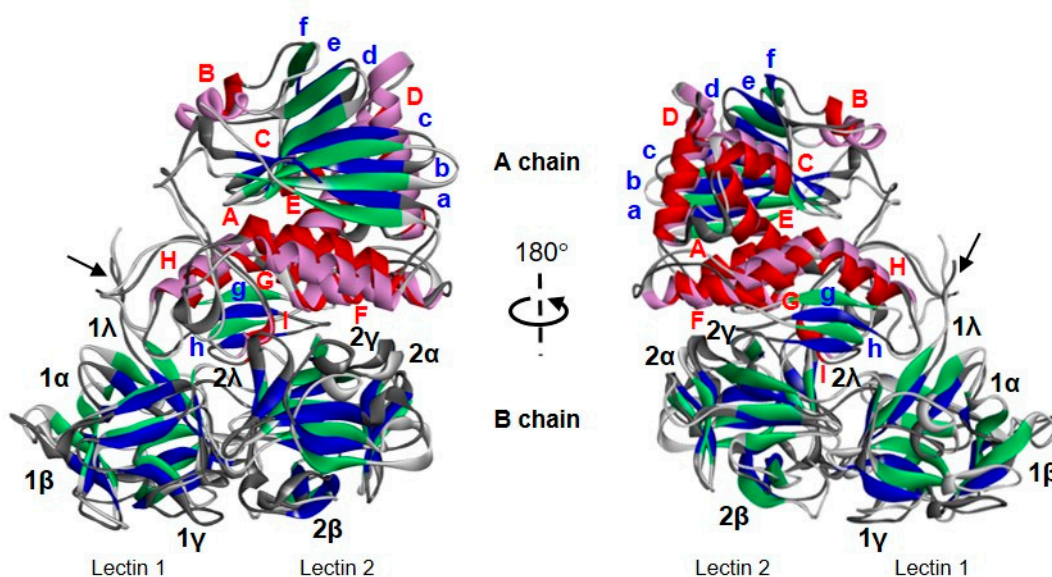

**Figure S2.** Superimposition of stenodactylin and ricin structure (Protein Data Bank accession number 2AAI). The three-dimensional structural modelling was carried out on the I-TASSER server and the figure was generated with Discovery Studio 2016. The  $\alpha$  helices (red and purple in stenodactylin and ricin, respectively), the  $\beta$  chains (blue and green in stenodactylin and ricin, respectively), and the coils (dark and light grey in stenodactylin and ricin, respectively) are represented. The helices are labelled A to I and the strands of the  $\beta$  sheets are labelled a to h in the A chain. The structural domains and subdomains in the B chain are also indicated. Arrows indicate the position of the disulfide bond linking A and B chains.

## 1α Subdomain

|               |    |                                                 |    |
|---------------|----|-------------------------------------------------|----|
| Stenodactylin | 10 | TAYIVGRDGRCDVKDEEFFDGNKVMWFECKSSQANQLWTIKRDGT   | 56 |
| Volkensin     | 10 | TAFIVGRDGRCDVKVEEFFDGNKVMWFECKSSQANQLWTIKRDGT   | 56 |
| Ricin         | 10 | IVRIVGRNGLCVDVRDGRFHNGNAIQWFECKSNTDANQLWTIKRDNT | 56 |
| Abrin-a       | 15 | TVRIGGRDGMCDVVDNGYHNGNRIIMWKCKDRLEENQLWTLKSDKT  | 61 |
| SNAI          | 14 | TRRISGWDGLCVDVRYGHYIDGNPVQLRECG--NECNQLWTFRTDGT | 58 |
| SSA           | 14 | TRRISGWDGLCVDVRGGHYIDGNPVQLRECG--NECNQLWTFRTDGT | 58 |
| SEA           | 11 | TRRISGWDGLCVDVSDHYIDGNPVQLSECG--NQCTQQWTFRTDGT  | 55 |
| IRAb          | 12 | TMRISGRDGYCMDVKDGLYHNGNPVTLSSCKQNDVNFQFWTFKSDGT | 58 |
| IRAr          | 11 | TMRISGRDGYCMDVKDGLYHNGNPVTLSSCKQNDVNFQFWTFKSDGT | 57 |

## 2γ Subdomain

|               |     |                                            |     |
|---------------|-----|--------------------------------------------|-----|
| Stenodactylin | 222 | IVNLLTGMVMDVKESNPSTNEITAHPPWFGNSNQWFL      | 258 |
| Volkensin     | 222 | IVNLRTGMVMDVKESNPSTNEITAHPPWFGNSNQWFL      | 258 |
| Ricin         | 224 | ILNLYSGLVLDVRASDPSLKQIILYPLHGDPNQIWLPLF    | 262 |
| Abrin-a       | 229 | IYSLYDDMVMDVKGS DPSLKQIILWPYTGKPNQIWLTLF   | 267 |
| SNAI          | 221 | ISNPNAKLMDVAQRDVSRLRKIILYRFTGNPNQWITTTTHPA | 262 |
| SSA           | 221 | ISNPNAKLMDVAQHDSRLRKIILYRFTGNPNQWITTTQPA   | 262 |
| SEA           | 218 | ISNPNTTKVMDVAQANVSLRKIILYRFTGNPNQWITTTTHPA | 259 |
| IRAb          | 226 | IYNLHSGYVMDVKQSDPSLQQIILWSTIGNPNQMWFTTF    | 264 |
| IRAr          | 225 | IHNLHSGYVMDVKQSDPSLQQIILWSTIGNPNQMWFTTF    | 263 |

**Figure S3.** Alignment between the sugar-binding subdomains of stenodactylin, volkensin (acc.no CAD61022) ricin (acc.no P02879), abrin-a (acc.no P11140), SNAI (acc.no AAC49158), SSA, SEA (acc.no CAQ42478), IRAb (acc.no Q8W2E7) and IRAr (acc.no AAL55093). The putative amino acids that are present in the sugar-binding sites (boxed in blue) and those involved in sugar binding (high-lighted in blue) are represented, and they were assigned by comparison with the structure of ricin (acc.no 2AAI, 3RTI and 3RTJ). The cysteines involved in disulfide bridges between B-chains of tetrameric RIPs are high-lighted in yellow. The dash indicates a gap introduced into the sequences to maximize alignments.
